# Supplementary material for: A Direct Comparison of the Relationship of Epigenetic Aging and Epigenetic Substance Consumption Markers to Mortality in the Framingham Heart Study
Source: Genes (Basel). 2019 Jan 15;10(1):51. doi: 10.3390/genes10010051 (PMC6356614; doi:10.3390/genes10010051)
Supplement: Supplementary file 1 [file genes-10-00051-s001.xlsx]

## Sheet: cg05575921 Correlations
Variable	r	r_sq	raw_p	fdr_q
cg10917602	0.233733	0.0546313	2.27e-29	1.17e-26
cg01252496	0.208223	0.043357	1.61e-23	4.15e-21
cg17605084	-0.184258	0.0339512	1.12e-18	1.92e-16
cg26104204	-0.176573	0.0311779	2.95e-17	3.79e-15
cg21120249	0.172071	0.0296085	1.87e-16	1.93e-14
cg12261786	0.170131	0.0289444	4.1e-16	3.51e-14
cg16313343	0.168447	0.0283743	8.02e-16	5.76e-14
cg00943950	-0.168164	0.028279	8.97e-16	5.76e-14
cg08251399	0.16425	0.0269779	4.14e-15	2.37e-13
cg18468844	0.162722	0.0264784	7.46e-15	3.83e-13
cg06975499	-0.160546	0.025775	1.71e-14	7.97e-13
cg27655905	-0.159976	0.0255922	2.11e-14	9.06e-13
cg04424621	0.159349	0.0253922	2.67e-14	1.06e-12
cg19663795	-0.155256	0.0241043	1.21e-13	4.46e-12
cg27440834	0.152337	0.0232067	3.49e-13	1.14e-11
cg13351161	0.152294	0.0231936	3.54e-13	1.14e-11
cg14918082	0.150901	0.0227712	5.82e-13	1.76e-11
cg23124451	0.149074	0.022223	1.11e-12	3.16e-11
cg00350702	-0.147277	0.0216905	2.07e-12	5.6e-11
cg08529529	0.1461	0.0213453	3.1e-12	7.97e-11
cg03703325	-0.141585	0.0200464	1.43e-11	3.49e-10
cg09045681	0.141305	0.0199672	1.56e-11	3.66e-10
cg13510262	-0.141065	0.0198995	1.69e-11	3.79e-10
cg12473775	0.139023	0.0193275	3.32e-11	7.1e-10
cg00515905	-0.138638	0.0192205	3.76e-11	7.73e-10
cg07265300	-0.138498	0.0191818	3.93e-11	7.78e-10
cg01221637	-0.136538	0.0186426	7.41e-11	1.41e-09
cg26581729	0.135905	0.0184701	9.07e-11	1.67e-09
cg16713727	0.135794	0.01844	9.4e-11	1.67e-09
cg01441777	0.132441	0.0175406	2.7e-10	4.63e-09
cg11600161	-0.131549	0.0173053	3.56e-10	5.91e-09
cg04480914	-0.130572	0.0170491	4.81e-10	7.73e-09
cg13718960	-0.129044	0.0166523	7.67e-10	1.19e-08
cg06690548	0.128429	0.0164939	9.24e-10	1.4e-08
cg13307384	0.125721	0.0158058	2.07e-09	3.05e-08
cg03007010	-0.124571	0.0155178	2.91e-09	4.15e-08
cg03172991	0.124026	0.0153824	3.41e-09	4.74e-08
cg06958034	-0.121699	0.0148106	6.68e-09	9.04e-08
cg09809672	0.120485	0.0145166	9.44e-09	1.24e-07
cg05492270	-0.11988	0.0143712	1.12e-08	1.44e-07
cg20492933	-0.117597	0.013829	2.12e-08	2.66e-07
cg21801378	0.116938	0.0136745	2.54e-08	3.11e-07
cg05294243	-0.116624	0.0136011	2.77e-08	3.31e-07
cg00335286	-0.11653	0.0135792	2.85e-08	3.32e-07
cg03929796	0.115437	0.0133257	3.83e-08	4.38e-07
cg19615059	-0.114048	0.0130069	5.58e-08	6.24e-07
cg01261503	0.111479	0.0124275	1.1e-07	1.18e-06
cg25881193	-0.111441	0.0124191	1.12e-07	1.18e-06
cg21201109	0.111406	0.0124112	1.13e-07	1.18e-06
cg08035942	-0.110424	0.0121935	1.46e-07	1.5e-06
cg00412772	0.110285	0.0121629	1.51e-07	1.52e-06
cg18241647	-0.105759	0.0111849	4.79e-07	4.73e-06
cg14550518	0.105555	0.011142	5.04e-07	4.89e-06
cg12247247	-0.104696	0.0109614	6.24e-07	5.94e-06
cg15811427	-0.104408	0.0109009	6.7e-07	6.26e-06
cg00297600	-0.104171	0.0108516	7.1e-07	6.52e-06
cg13042288	0.103917	0.0107988	7.56e-07	6.82e-06
cg13120519	-0.102694	0.0105461	1.02e-06	9.03e-06
cg27187881	0.101596	0.0103217	1.33e-06	1.152e-05
cg08074477	0.101544	0.0103112	1.35e-06	1.152e-05
cg16612562	0.101478	0.0102978	1.37e-06	1.152e-05
cg04169469	-0.100618	0.0101239	1.68e-06	1.39251e-05
cg26866325	-0.099679	0.00993589	2.1e-06	1.71226e-05
cg17133388	0.0994933	0.00989891	2.19e-06	1.76102e-05
cg17896249	-0.0990474	0.00981039	2.44e-06	1.9051e-05
cg05228408	0.0990282	0.00980659	2.45e-06	1.9051e-05
cg15881088	-0.0983317	0.00966912	2.88e-06	2.20886e-05
cg20572838	-0.097894	0.00958324	3.19e-06	2.40971e-05
cg04836038	-0.0961623	0.00924718	4.75e-06	3.53851e-05
cg14423778	0.0960356	0.00922284	4.89e-06	3.59028e-05
cg07073964	0.0956029	0.00913991	5.4e-06	3.90603e-05
cg04333463	0.0954735	0.00911518	5.56e-06	3.93683e-05
cg01254459	-0.0954459	0.00910991	5.59e-06	3.93683e-05
cg12145907	0.0953159	0.00908511	5.76e-06	3.99975e-05
cg17129388	0.0944045	0.00891221	7.07e-06	4.8466e-05
cg25898500	-0.093158	0.00867841	9.34e-06	6.31582e-05
cg00687674	-0.0919946	0.00846301	1.20675e-05	8.05547e-05
cg00083937	0.0919102	0.00844749	1.22926e-05	8.10052e-05
epiage	-0.0914576	0.00836449	1.35698e-05	8.82897e-05
cg24556026	0.0906757	0.00822208	1.60794e-05	0.00010331
cg27015931	-0.0898236	0.00806827	1.93158e-05	0.000122572
cg20891917	0.089183	0.00795361	2.21472e-05	0.000138825
cg22809047	0.0887696	0.00788005	2.41796e-05	0.000148613
cg16085042	-0.0887487	0.00787634	2.42869e-05	0.000148613
cg16718891	-0.0881664	0.00777332	2.74659e-05	0.000166088
cg20652640	-0.0880157	0.00774676	2.83511e-05	0.000169447
cg22512531	-0.0877567	0.00770124	2.99355e-05	0.00017686
cg16357381	-0.0869314	0.00755707	3.55645e-05	0.000207729
cg10900550	-0.086705	0.00751776	3.72759e-05	0.000212992
cg19297232	0.0867027	0.00751735	3.72944e-05	0.000212992
cg12324144	-0.0865222	0.00748609	3.87148e-05	0.000218675
cg02735486	-0.0861767	0.00742642	4.15793e-05	0.000232302
cg13509147	-0.0858904	0.00737716	4.41038e-05	0.000243756
cg21993406	0.0853558	0.00728561	4.92118e-05	0.000269094
cg14281160	-0.0844514	0.00713204	5.91513e-05	0.00032004
cg16984944	0.0837425	0.00701281	6.82396e-05	0.000365366
cg12985418	-0.0832023	0.00692263	7.60359e-05	0.000402912
cg08896629	-0.0827477	0.00684718	8.32419e-05	0.000436595
cg14159818	-0.082373	0.00678531	8.96613e-05	0.000465514
cg03977782	-0.0820445	0.0067313	9.56714e-05	0.000491751
cg20234170	0.081844	0.00669845	9.9523e-05	0.000506483
cg09413557	-0.0814682	0.00663708	0.000107141	0.000539908
cg26746469	-0.081249	0.0066014	0.000111836	0.000556383
cg14916213	-0.0812153	0.00659592	0.000112576	0.000556383
cg05125838	0.0804458	0.00647153	0.000130748	0.00064004
cg25256723	0.0788082	0.00621074	0.000179006	0.000861683
cg26201213	0.0787973	0.00620902	0.000179378	0.000861683
cg05532892	0.0786042	0.00617862	0.000186076	0.000879617
cg00113951	-0.0785912	0.00617658	0.000186534	0.000879617
cg08668790	0.0783536	0.00613929	0.000195117	0.000911727
cg08169325	0.0773975	0.00599038	0.000233543	0.00108145
cg09304040	-0.0773462	0.00598243	0.000235796	0.00108213
cg19632206	0.0766765	0.00587929	0.0002671	0.00121495
cg02976574	0.0765473	0.00585949	0.00027357	0.00123346
cg22511262	0.0761659	0.00580125	0.00029354	0.001312
cg26614073	0.0758604	0.0057548	0.00031051	0.00137588
cg02229946	-0.0758094	0.00574707	0.000313431	0.00137696
cg06637774	0.0757062	0.00573143	0.000319421	0.00139138
cg13564075	-0.0752517	0.00566282	0.000347097	0.00149922
cg10922280	-0.0748389	0.00560086	0.00037416	0.00160265
cg26842024	-0.074062	0.00548518	0.000430512	0.00181721
cg16648841	-0.0740516	0.00548363	0.000431321	0.00181721
cg09556292	-0.073973	0.005472	0.000437453	0.00182805
cg14350002	-0.0735955	0.0054163	0.000468059	0.00194018
cg23818978	0.0730665	0.00533871	0.000514322	0.00211489
cg01211097	0.0723785	0.00523864	0.000580867	0.00236957
cg23668631	0.0722763	0.00522386	0.000591409	0.00239358
cg26312920	-0.0721767	0.00520948	0.000601852	0.00241681
cg22090592	0.071853	0.00516285	0.000637	0.00253813
cg21835643	0.0712699	0.00507939	0.000705164	0.00278811
cg21099326	-0.0710286	0.00504506	0.000735301	0.00288507
cg26357744	0.0708085	0.00501384	0.000763834	0.00297432
cg19287114	-0.0704913	0.00496902	0.000806767	0.00311788
cg20162159	-0.0700428	0.00490599	0.000871297	0.00334214
cg12743894	-0.069852	0.0048793	0.000900169	0.00342731
cg06144905	0.0689192	0.00474986	0.00105451	0.00398544
cg17526300	-0.0685037	0.00469275	0.00113087	0.00424281
cg13975369	0.0669749	0.00448563	0.00145787	0.00543003
cg14105047	-0.0666605	0.00444362	0.0015351	0.00567655
cg25136687	-0.0662407	0.00438782	0.00164408	0.00603613
cg23338195	-0.0659131	0.00434454	0.001734	0.0063211
cg20173259	-0.0657942	0.00432888	0.00176774	0.00639873
cg00503840	0.0656266	0.00430685	0.00181635	0.00652722
cg01056568	-0.0655849	0.00430137	0.00182864	0.00652722
cg01459453	0.0652262	0.00425446	0.00193745	0.00686793
cg15903282	0.0651372	0.00424285	0.00196536	0.00691914
cg26824091	0.0649188	0.00421445	0.00203541	0.007117
cg11237115	-0.0647547	0.00419318	0.00208952	0.00725683
cg05087948	0.0646451	0.00417899	0.00212641	0.00733538
cg00261781	0.0641598	0.00411647	0.00229702	0.00787113
cg17903544	0.063262	0.00400208	0.00264601	0.00900694
cg19514469	0.063147	0.00398754	0.00269405	0.00911016
cg21184495	-0.0629724	0.00396552	0.00276852	0.00930078
cg00410898	-0.0624749	0.00390311	0.00299113	0.00998339
cg23832061	-0.0617718	0.00381576	0.00333359	0.0110546
cg16816226	0.0614218	0.00377264	0.00351705	0.0115882
cg14175438	0.061309	0.0037588	0.00357809	0.0116893
cg11618577	0.0612814	0.00375541	0.0035932	0.0116893
cg13656360	-0.0611635	0.00374097	0.00365828	0.0118261
cg01128603	0.0605242	0.00366317	0.00403029	0.0129473
cg01137065	0.0602341	0.00362815	0.00421009	0.0134409
cg22407458	0.0601095	0.00361315	0.00428955	0.01361
cg06327515	-0.05995	0.00359401	0.00439323	0.0138535
cg22991148	0.0598712	0.00358457	0.0044453	0.0139245
cg21200703	-0.0598342	0.00358014	0.00446993	0.0139245
cg08487374	-0.0591493	0.00349863	0.00494896	0.0152485
cg24674703	-0.059142	0.00349777	0.00495428	0.0152485
cg07494518	-0.0588345	0.0034615	0.00518427	0.0158614
cg03991512	0.0584814	0.00342007	0.00546021	0.0166068
cg16173067	0.058044	0.0033691	0.00582038	0.0175981
cg19685066	-0.0576261	0.00332077	0.0061843	0.0185891
cg21081971	-0.0573797	0.00329243	0.00640835	0.0191505
cg11177450	0.0571138	0.00326198	0.00665834	0.019759
cg26394940	0.057082	0.00325835	0.00668883	0.019759
cg13409216	-0.056079	0.00314485	0.00771664	0.0226649
cg00338702	0.0557955	0.00311314	0.00803168	0.0234562
cg00168942	-0.0557056	0.00310311	0.00813397	0.0236207
cg24125648	-0.0553772	0.00306663	0.00851765	0.0245959
cg02228185	-0.0545813	0.00297911	0.00951532	0.0273233
cg02154074	0.0543511	0.00295404	0.00982264	0.0280298
cg24407308	-0.0543159	0.00295021	0.0098704	0.0280298
cg18809289	-0.053462	0.00285819	0.0110943	0.0313323
cg01131735	0.0531442	0.00282431	0.0115832	0.0325341
cg04007936	0.0528862	0.00279695	0.011994	0.033505
cg00744433	0.0528418	0.00279226	0.0120659	0.0335237
cg24304712	-0.0524772	0.00275386	0.0126716	0.0350174
cg17966192	0.0511706	0.00261843	0.015069	0.0414197
cg22983092	-0.0504307	0.00254326	0.0165966	0.0453758
cg05759269	0.0502404	0.0025241	0.0170108	0.0462623
cg14747225	-0.0501964	0.00251968	0.017108	0.0462816
cg26898166	-0.0498212	0.00248215	0.0179555	0.04832
cg01335367	-0.0496538	0.0024655	0.0183454	0.0491123
cg26350286	-0.0495044	0.00245068	0.0186996	0.0495175
cg23239039	-0.049447	0.002445	0.0188373	0.0495175
cg04718414	0.0494404	0.00244435	0.0188532	0.0495175
cg14689355	-0.0494283	0.00244316	0.0188822	0.0495175
cg21207418	-0.0490495	0.00240585	0.0198151	0.0517003
cg10636246	-0.0489171	0.00239288	0.0201504	0.0521169
cg27514224	0.0489064	0.00239184	0.0201775	0.0521169
cg07038400	0.0486664	0.00236842	0.020799	0.0534535
cg26022315	-0.0484468	0.00234709	0.021382	0.0546783
cg09096950	-0.0482038	0.00232361	0.0220436	0.0559372
cg04087608	0.0481863	0.00232192	0.0220919	0.0559372
cg19731122	0.0477723	0.00228219	0.0232624	0.0586121
cg12188560	-0.0471479	0.00222292	0.0251296	0.0630079
cg02197293	0.0470365	0.00221243	0.0254759	0.0635661
cg17431739	-0.0469585	0.0022051	0.025721	0.0638676
cg01930621	-0.0467066	0.00218151	0.026526	0.0655499
cg12289045	-0.046662	0.00217734	0.026671	0.0655929
cg05898102	-0.0464102	0.0021539	0.0275014	0.067313
cg16728114	-0.0463508	0.0021484	0.0277004	0.0674786
cg00230271	-0.0461844	0.002133	0.0282648	0.0684854
cg11833861	0.0461507	0.00212989	0.0283801	0.0684854
cg13296371	0.045779	0.00209572	0.0296814	0.0711135
cg24332433	-0.0457609	0.00209406	0.0297459	0.0711135
cg22282672	0.0456436	0.00208334	0.0301679	0.0717883
cg16354207	-0.045489	0.00206925	0.0307317	0.0727733
cg26212924	-0.0454528	0.00206596	0.0308649	0.0727733
cg20967028	0.0450858	0.00203273	0.0322453	0.0756806
cg13613532	-0.0448944	0.00201551	0.0329855	0.0770661
cg06363129	0.0447997	0.00200701	0.0333574	0.0775823
cg13843773	0.0446943	0.00199758	0.0337752	0.0782002
cg07817698	0.0432908	0.00187409	0.0397805	0.0916913
cg16372520	-0.0432336	0.00186915	0.040043	0.0918844
cg01651821	-0.0431215	0.00185946	0.0405624	0.0926625
cg22580353	0.0429613	0.00184567	0.0413147	0.0939635
cg18771300	0.0428498	0.00183611	0.0418448	0.0943849
cg25251635	-0.0428451	0.0018357	0.0418672	0.0943849
cg27367952	0.0425901	0.00181392	0.0431026	0.0967455
cg17641104	-0.0424681	0.00180354	0.0437046	0.0976702
cg05270634	0.0421965	0.00178054	0.0450696	0.100285
cg03258472	0.0419444	0.00175933	0.0463687	0.102731
cg27493997	-0.0417045	0.00173926	0.0476343	0.105082
cg25092328	-0.0414605	0.00171898	0.0489506	0.107211
cg08872493	-0.041446	0.00171777	0.0490303	0.107211
cg07236943	0.0414103	0.00171481	0.0492253	0.107211
cg16408970	0.0409964	0.0016807	0.0515397	0.111778
cg23213217	0.0409517	0.00167704	0.051795	0.11186
cg18003795	-0.0406099	0.00164917	0.0537815	0.115664
cg26096837	0.0401307	0.00161047	0.0566745	0.121378
cg13656062	-0.0400138	0.00160111	0.0573992	0.12242
cg22473095	-0.0396891	0.00157522	0.0594534	0.126277
cg05851163	0.0395866	0.0015671	0.0601144	0.127156
cg15887846	0.0393574	0.001549	0.0616145	0.129794
cg17749443	0.0389453	0.00151674	0.0643889	0.134835
cg18693704	0.0389245	0.00151512	0.0645317	0.134835
cg11459714	-0.0388038	0.00150574	0.0653651	0.136023
cg09434995	-0.0387315	0.00150013	0.0658688	0.136152
cg01946401	0.0387189	0.00149916	0.0659568	0.136152
cg00955230	0.0379676	0.00144154	0.0713863	0.14677
cg04818845	0.0378352	0.0014315	0.0723802	0.148221
cg11631518	-0.0377117	0.00142217	0.0733176	0.149056
cg19560210	-0.0377012	0.00142138	0.0733977	0.149056
cg13460409	0.0376671	0.00141881	0.073658	0.149056
cg27626102	0.0375041	0.00140656	0.0749151	0.151005
cg13631913	-0.0370641	0.00137375	0.078395	0.157403
cg17923358	-0.0370242	0.00137079	0.0787171	0.157434
cg23234999	0.0365702	0.00133738	0.0824567	0.164274
cg08899632	0.0364247	0.00132676	0.0836855	0.166079
cg03112869	-0.0361966	0.0013102	0.0856407	0.169305
cg18392482	0.0357662	0.00127922	0.0894316	0.176122
cg08587542	0.0356147	0.00126841	0.0907977	0.17813
cg22395019	0.0354305	0.00125532	0.0924818	0.180744
cg17940013	0.0352304	0.00124118	0.0943389	0.183675
cg09630437	-0.0350917	0.00123143	0.095643	0.185511
cg15344028	0.0347569	0.00120804	0.0988518	0.191014
cg15856055	-0.0347181	0.00120535	0.0992289	0.191025
cg24493940	-0.0346278	0.00119908	0.100112	0.192006
cg13550877	0.0345206	0.00119167	0.101168	0.192869
cg19104072	-0.0344895	0.00118953	0.101476	0.192869
cg13899108	-0.0344681	0.00118805	0.101688	0.192869
cg26219051	0.0343877	0.00118252	0.102489	0.193674
cg19722847	0.0343138	0.00117743	0.10323	0.194123
cg22197830	0.0342888	0.00117572	0.103482	0.194123
cg10052840	0.0341425	0.00116571	0.104964	0.195631
cg04014889	0.0341239	0.00116444	0.105153	0.195631
cg07180649	-0.034097	0.0011626	0.105428	0.195631
cg01626227	0.0340049	0.00115633	0.106373	0.196675
cg18267374	-0.0337242	0.00113732	0.109293	0.199905
cg24505122	-0.0337192	0.00113699	0.109345	0.199905
cg13861644	-0.033688	0.00113488	0.109675	0.199905
cg23376526	-0.0336879	0.00113487	0.109676	0.199905
cg23152772	-0.0336397	0.00113163	0.110184	0.200123
cg15642326	0.032671	0.0010674	0.12082	0.218666
cg05501584	0.0323675	0.00104765	0.124312	0.223573
cg19439331	-0.03236	0.00104717	0.1244	0.223573
cg23568913	-0.032278	0.00104187	0.125358	0.224508
cg01450842	-0.0320161	0.00102503	0.128454	0.229254
cg25769980	0.0316527	0.0010019	0.132848	0.236276
cg04736140	-0.0316029	0.000998746	0.133459	0.236545
cg12269343	-0.0314338	0.000988085	0.135551	0.239427
cg18881501	0.0313959	0.000985705	0.136023	0.239438
cg14223995	0.0311222	0.000968594	0.139471	0.24467
cg11903057	0.0310278	0.000962724	0.140677	0.245945
cg25459323	0.0306264	0.000937978	0.145888	0.254192
cg12991365	-0.0303262	0.000919678	0.149882	0.260269
cg24921089	0.0300991	0.000905957	0.152958	0.264716
cg12265604	-0.029967	0.000898024	0.154769	0.266541
cg08654655	-0.0299467	0.000896803	0.15505	0.266541
cg21762589	0.0297156	0.000883018	0.158261	0.271155
cg16743289	0.0296775	0.000880753	0.158796	0.271167
cg26109803	0.0294909	0.000869714	0.161433	0.274756
cg03623878	0.0293228	0.000859827	0.163837	0.277927
cg15551881	-0.0291026	0.000846964	0.167025	0.282405
cg07929310	-0.0289868	0.000840234	0.168722	0.284338
cg08694544	0.0289045	0.000835469	0.169935	0.28464
cg15171237	-0.0288995	0.00083518	0.170009	0.28464
cg12402251	-0.0286599	0.000821392	0.173578	0.289672
cg19686152	-0.0285617	0.00081577	0.175058	0.291197
cg17861230	-0.0283427	0.000803309	0.17839	0.295782
cg21926612	0.0282946	0.000800584	0.179129	0.296052
cg09480837	-0.0282442	0.000797737	0.179904	0.29638
cg10158181	0.0280889	0.000788989	0.182311	0.298975
cg18587364	-0.0280677	0.000787793	0.182642	0.298975
cg22736354	-0.027871	0.000776794	0.185728	0.30306
cg01623187	-0.0276156	0.000762619	0.189794	0.308715
cg15498283	0.0275286	0.000757826	0.191192	0.309264
cg20550118	0.0275198	0.00075734	0.191335	0.309264
cg23127998	0.0271082	0.000734852	0.198063	0.319136
cg05441133	-0.0269716	0.000727467	0.200333	0.321785
cg22179082	0.0267321	0.000714606	0.20436	0.327071
cg07850604	0.0266703	0.000711304	0.205409	0.327071
cg11487705	-0.026663	0.000710914	0.205533	0.327071
cg07484827	0.0266181	0.000708522	0.206298	0.327275
cg01400401	-0.0264144	0.000697722	0.209791	0.331793
cg05440289	-0.0263493	0.000694287	0.210917	0.332551
cg09799873	0.0262598	0.000689579	0.212472	0.333977
cg26711820	-0.0260878	0.000680576	0.215483	0.337678
cg18117393	0.0259543	0.000673628	0.217842	0.340336
cg11490446	0.0258855	0.00067006	0.219065	0.34121
cg01918706	0.0257079	0.000660897	0.222244	0.345116
cg23159337	-0.0255782	0.000654245	0.224586	0.347703
cg10667970	-0.0255104	0.00065078	0.225818	0.34856
cg05422352	0.0254681	0.000648623	0.226589	0.348703
cg21649520	0.0252755	0.000638853	0.230121	0.353081
cg20674577	-0.0251918	0.000634627	0.231669	0.354398
cg16543027	-0.0251441	0.000632224	0.232555	0.354698
cg20828084	0.0247042	0.000610297	0.240831	0.366234
cg18001427	-0.0244121	0.000595952	0.246439	0.373657
cg03340261	-0.0243548	0.000593157	0.24755	0.374238
cg18384097	0.0242528	0.0005882	0.249536	0.376089
cg02016419	0.0242169	0.000586459	0.250238	0.376089
cg13854874	0.0240007	0.000576033	0.254494	0.379553
cg02480835	-0.0239992	0.000575959	0.254524	0.379553
cg06189653	-0.0239873	0.000575392	0.254758	0.379553
cg16295988	-0.0235525	0.00055472	0.263474	0.391404
cg18996776	-0.0231379	0.000535362	0.271974	0.402098
cg04616566	-0.0230921	0.000533244	0.272925	0.402098
cg00079056	-0.0230875	0.000533034	0.27302	0.402098
cg01114088	0.0230474	0.000531182	0.273855	0.402175
cg11896923	-0.0228809	0.000523538	0.277335	0.40518
cg17627559	0.0228742	0.000523229	0.277477	0.40518
cg15569512	0.0227103	0.000515757	0.280936	0.407002
cg10654016	-0.0227101	0.00051575	0.280939	0.407002
cg08212685	0.0227025	0.000515403	0.281101	0.407002
cg12238343	0.0221848	0.000492166	0.292219	0.420963
cg22194129	-0.0221676	0.000491402	0.292594	0.420963
cg06295856	0.0221398	0.00049017	0.2932	0.420963
cg26382071	-0.0219624	0.000482349	0.297085	0.425183
cg22947000	0.0219303	0.000480936	0.297793	0.425183
cg10523019	-0.0217077	0.000471225	0.302724	0.431025
cg26932976	-0.0215381	0.00046389	0.306518	0.435222
cg14473016	0.0214067	0.000458246	0.30948	0.438217
cg13514050	-0.0213082	0.000454041	0.311711	0.440163
cg02503970	-0.0205437	0.000422045	0.329394	0.462654
cg22594309	0.0205419	0.000421968	0.329438	0.462654
cg15201877	0.020424	0.00041714	0.332221	0.46529
cg21712685	-0.0202552	0.000410274	0.336233	0.467639
cg15381313	0.0202477	0.00040997	0.336412	0.467639
cg22971191	-0.0202387	0.000409605	0.336628	0.467639
cg21296230	0.0201455	0.000405841	0.338858	0.469469
cg02071305	-0.0199025	0.000396109	0.344718	0.476303
cg10202457	-0.0198156	0.000392657	0.346828	0.477156
cg21907579	0.0198007	0.000392067	0.347191	0.477156
cg01519742	0.019729	0.000389233	0.34894	0.478281
cg00845900	-0.0195574	0.000382493	0.353148	0.482761
cg11426590	0.0194066	0.000376617	0.356873	0.486559
cg25229964	0.0192838	0.000371865	0.359925	0.489422
cg05442902	-0.0192324	0.000369886	0.361207	0.489869
cg10570177	0.019173	0.000367603	0.362694	0.490591
cg06493994	0.0188399	0.000354942	0.371092	0.500633
cg23191950	0.0187439	0.000351333	0.373536	0.501159
cg08900043	0.0186961	0.000349543	0.374757	0.501159
cg13323474	-0.0186831	0.000349057	0.375089	0.501159
cg00862290	-0.0186716	0.000348629	0.375382	0.501159
cg13700897	-0.0184282	0.0003396	0.381638	0.508192
cg16854606	-0.0183778	0.000337742	0.382944	0.508612
cg13587552	-0.0182043	0.000331395	0.387452	0.513274
cg14972143	0.018165	0.000329965	0.388478	0.513311
cg17324128	0.0179761	0.00032314	0.39343	0.517476
cg26665419	-0.017968	0.000322848	0.393644	0.517476
cg08067365	-0.0176602	0.000311882	0.401799	0.526849
cg08424423	0.0173784	0.000302008	0.409353	0.535388
cg16466334	-0.0169891	0.000288628	0.419928	0.547825
cg19345165	0.0165258	0.000273101	0.432718	0.562911
cg18691434	0.0164912	0.000271959	0.433682	0.562911
cg10878896	0.0163537	0.000267443	0.437525	0.566469
cg15427448	0.0161428	0.000260589	0.44346	0.57271
cg09548179	0.0158265	0.000250478	0.452444	0.582848
cg04601137	-0.0155511	0.000241835	0.460351	0.591551
cg25536676	0.0151243	0.000228744	0.472753	0.605973
cg13994175	-0.0150376	0.000226128	0.475296	0.606225
cg13218906	0.0150302	0.000225907	0.475512	0.606225
cg22484793	0.014997	0.00022491	0.476488	0.606225
cg18732541	0.0146157	0.000213617	0.487772	0.619049
cg14754581	0.0142793	0.000203899	0.497842	0.628838
cg15489301	-0.0142526	0.000203138	0.498646	0.628838
cg12373771	-0.0142357	0.000202656	0.499156	0.628838
cg19556572	0.01413	0.000199657	0.502348	0.631312
cg10225525	-0.013932	0.0001941	0.508357	0.636023
cg03387497	-0.013925	0.000193905	0.508571	0.636023
cg20090497	-0.0138052	0.000190583	0.512225	0.639038
cg09196959	-0.0137631	0.000189424	0.51351	0.63909
cg19028160	0.013683	0.000187226	0.515964	0.640593
cg22396353	0.0135828	0.000184494	0.519043	0.642119
cg20761322	0.0135618	0.000183921	0.519692	0.642119
cg24110063	-0.0133688	0.000178725	0.52565	0.647923
cg06134964	-0.0131553	0.000173061	0.532285	0.654533
cg21053529	-0.0130318	0.000169828	0.536141	0.6577
cg24505341	0.012981	0.000168506	0.537732	0.658081
cg00582628	-0.012893	0.000166231	0.54049	0.659876
cg05089968	-0.0128524	0.000165185	0.541766	0.659876
cg01511567	0.0126873	0.000160967	0.546972	0.664643
cg26394737	-0.0124779	0.000155698	0.553608	0.669946
cg15611364	0.0124673	0.000155435	0.553944	0.669946
cg09254939	-0.0123709	0.00015304	0.557014	0.672078
cg27244482	0.0123078	0.000151482	0.559027	0.672928
cg00462994	0.0120012	0.000144029	0.568861	0.683165
cg14009688	0.0118537	0.00014051	0.57362	0.687275
cg17009433	0.0117704	0.000138542	0.576317	0.688811
cg15966757	-0.0117313	0.000137625	0.577583	0.688811
cg21137706	0.0114933	0.000132095	0.585331	0.694909
cg06908778	-0.0114911	0.000132046	0.5854	0.694909
cg00412805	0.0113636	0.000129131	0.589571	0.698248
cg12177001	0.011149	0.0001243	0.596617	0.704968
cg13258700	-0.0110746	0.000122646	0.599071	0.706244
cg23173910	-0.0110236	0.000121519	0.600754	0.706608
cg25428451	-0.0108453	0.000117621	0.606656	0.711311
cg20066677	-0.0108192	0.000117056	0.607521	0.711311
cg02631957	-0.0106619	0.000113676	0.612754	0.715808
cg24651706	-0.0105763	0.000111858	0.615611	0.716387
cg05473871	-0.0105635	0.000111588	0.616037	0.716387
cg20570279	-0.0104121	0.000108412	0.621103	0.719068
cg17038116	-0.0103982	0.000108123	0.621569	0.719068
cg16319578	0.0103693	0.000107522	0.622539	0.719068
cg02151301	-0.00998639	9.9728e-05	0.635446	0.73233
cg07654934	0.00986433	9.7305e-05	0.639583	0.735449
cg04755031	-0.00970424	9.41723e-05	0.645027	0.740054
cg11233384	0.00961294	9.24086e-05	0.648141	0.741969
cg10669058	0.0093203	8.6868e-05	0.658161	0.751766
cg17770886	0.00920169	8.46711e-05	0.66224	0.754748
cg09322949	-0.00912859	8.33312e-05	0.664758	0.755942
cg19724470	0.00900568	8.11024e-05	0.669002	0.759088
cg25713185	-0.00885023	7.83266e-05	0.674385	0.76351
cg09404633	0.00875946	7.67281e-05	0.677535	0.765392
cg26815229	-0.00854735	7.30572e-05	0.68492	0.772037
cg23710218	0.00803013	6.4483e-05	0.703051	0.79074
cg03724882	0.00794398	6.31068e-05	0.706088	0.792422
cg12864235	0.00769645	5.92354e-05	0.71484	0.800496
cg05697249	0.00764657	5.84701e-05	0.716608	0.800731
cg21006686	0.00759298	5.76533e-05	0.718509	0.801115
cg10795646	-0.0075062	5.6343e-05	0.721592	0.80281
cg03535648	-0.00723604	5.23603e-05	0.731217	0.811762
cg07211259	-0.00716311	5.13102e-05	0.733823	0.812898
cg19586576	-0.00707543	5.00618e-05	0.73696	0.813123
cg24208206	-0.00705937	4.98347e-05	0.737535	0.813123
cg09892203	-0.00702486	4.93486e-05	0.738771	0.813123
cg19008809	0.0069372	4.81247e-05	0.741914	0.814837
cg08475827	0.0068672	4.71584e-05	0.744427	0.814974
cg04416752	-0.00684539	4.68594e-05	0.74521	0.814974
cg19398783	0.00679599	4.61855e-05	0.746986	0.815182
cg16340918	-0.00675015	4.55645e-05	0.748635	0.81525
cg14467840	0.00670403	4.4944e-05	0.750295	0.815331
cg19883905	0.00648242	4.20218e-05	0.758287	0.822278
cg26091688	-0.00620107	3.84533e-05	0.768472	0.831568
cg03819692	-0.0061486	3.78053e-05	0.770376	0.831876
cg15013019	-0.00587741	3.4544e-05	0.780238	0.840759
cg16933388	0.0054929	3.01719e-05	0.794281	0.854101
cg12813792	-0.00540424	2.92058e-05	0.797529	0.855803
cg03565081	-0.00494071	2.44106e-05	0.814564	0.872263
cg17536848	0.00486334	2.36521e-05	0.817416	0.873488
cg08586737	0.00478982	2.29423e-05	0.820129	0.873488
cg06171242	0.00473168	2.23888e-05	0.822276	0.873488
cg19356189	0.00470997	2.21839e-05	0.823077	0.873488
cg22495124	0.00463968	2.15266e-05	0.825675	0.873488
cg10591174	0.00463345	2.14689e-05	0.825905	0.873488
cg13119609	-0.00434829	1.89077e-05	0.836464	0.882086
cg06533629	-0.00432123	1.8673e-05	0.837467	0.882086
cg21363706	0.0042571	1.81229e-05	0.839846	0.882244
cg19371795	0.00422469	1.7848e-05	0.841049	0.882244
cg13654195	0.00410072	1.68159e-05	0.845654	0.885267
cg19149785	0.00401463	1.61172e-05	0.848855	0.885485
cg19573166	-0.00400248	1.60198e-05	0.849307	0.885485
cg13571802	-0.00393781	1.55063e-05	0.851713	0.886196
cg00194146	-0.00380935	1.45111e-05	0.856498	0.889373
cg02802055	-0.00361534	1.30707e-05	0.863733	0.895078
cg02309431	-0.00291348	8.49e-06	0.889998	0.920441
cg04528819	0.00281874	7.95e-06	0.893554	0.922241
cg15963417	0.00277149	7.68e-06	0.895328	0.922241
cg05316065	0.00247711	6.14e-06	0.906391	0.93177
cg15447479	-0.00223874	5.01e-06	0.915364	0.939116
cg09851465	-0.00201574	4.06e-06	0.923767	0.944585
cg13449372	-0.00199975	4e-06	0.92437	0.944585
cg04084157	-0.00183708	3.37e-06	0.930506	0.948969
cg25022327	-0.00177978	3.17e-06	0.932668	0.94929
cg19378133	0.00170285	2.9e-06	0.935572	0.950364
cg17726022	0.00159708	2.55e-06	0.939566	0.95105
cg04359302	0.00158698	2.52e-06	0.939948	0.95105
cg06994793	-0.00135918	1.85e-06	0.948555	0.957873
cg06638451	-0.000922496	8.51e-07	0.96507	0.971506
cg22582569	-0.000902264	8.14e-07	0.965836	0.971506
cg08331960	-0.000728718	5.31e-07	0.972404	0.976203
cg09294589	0.000375648	1.41e-07	0.985773	0.987694
cg19566405	-0.000118684	1.41e-08	0.995505	0.995505

## Sheet: cg04987734 Correlations
Variable	r	r_sq	raw_p	fdr_q
cg10922280	0.525041	0.275668	4.51e-160	2.32e-157
cg15551881	0.36392	0.132438	1.34e-71	3.45e-69
cg21207418	0.36335	0.132023	2.3e-71	3.95e-69
cg18809289	0.347234	0.120571	6.27e-65	8.06e-63
cg26842024	0.301536	0.090924	1.22e-48	1.25e-46
cg17861230	0.299311	0.089587	6.44e-48	5.52e-46
cg24674703	0.289719	0.0839371	7.1e-45	5.21e-43
cg19556572	0.286776	0.0822405	5.77e-44	3.71e-42
epiage	0.280374	0.0786094	5.05e-42	2.89e-40
cg15013019	0.279117	0.0779065	1.2e-41	6.16e-40
cg14159818	0.275191	0.0757304	1.73e-40	8.09e-39
cg11600161	0.262121	0.0687074	9.21e-37	3.95e-35
cg24125648	0.260875	0.0680557	2.04e-36	8.05e-35
cg24921089	0.259046	0.0671046	6.47e-36	2.38e-34
cg06144905	-0.255824	0.065446	4.85e-35	1.66e-33
cg22947000	-0.25381	0.0644196	1.68e-34	5.41e-33
cg10917602	-0.253105	0.0640619	2.6e-34	7.86e-33
cg21120249	-0.24349	0.0592874	8.35e-32	2.39e-30
cg06493994	0.238424	0.056846	1.58e-30	4.28e-29
cg10523019	0.23572	0.0555641	7.4e-30	1.9e-28
cg17009433	0.232411	0.0540148	4.76e-29	1.16e-27
cg16933388	0.231544	0.0536127	7.71e-29	1.8e-27
cg22194129	0.2283	0.0521208	4.61e-28	1.03e-26
cg20652640	0.225812	0.0509912	1.79e-27	3.82e-26
cg02229946	0.224075	0.0502094	4.55e-27	9.36e-26
cg07654934	0.222278	0.0494076	1.19e-26	2.35e-25
cg10900550	0.220831	0.0487663	2.55e-26	4.86e-25
cg13120519	0.219418	0.0481444	5.37e-26	9.86e-25
cg27493997	0.217885	0.0474739	1.2e-25	2.12e-24
cg18267374	0.217277	0.0472095	1.64e-25	2.81e-24
cg04528819	0.216123	0.0467091	2.98e-25	4.94e-24
cg04424621	-0.214516	0.0460172	6.8e-25	1.09e-23
cg14223995	0.213919	0.0457611	9.22e-25	1.44e-23
cg00687674	0.211434	0.0447043	3.25e-24	4.91e-23
cg26866325	0.210268	0.0442128	5.83e-24	8.56e-23
cg05089968	0.20925	0.0437855	9.69e-24	1.38e-22
cg19586576	0.208568	0.0435006	1.36e-23	1.89e-22
cg04836038	0.206287	0.0425544	4.19e-23	5.67e-22
cg16543027	0.203712	0.0414984	1.47e-22	1.94e-21
cg19104072	0.202516	0.0410129	2.62e-22	3.36e-21
cg24407308	0.201841	0.0407396	3.62e-22	4.54e-21
cg22736354	0.200394	0.0401577	7.22e-22	8.83e-21
cg16085042	0.197938	0.0391793	2.3e-21	2.75e-20
cg23832061	0.19536	0.0381654	7.66e-21	8.94e-20
cg15201877	0.19491	0.0379898	9.43e-21	1.08e-19
cg14423778	-0.192812	0.0371764	2.47e-20	2.76e-19
cg27015931	0.192328	0.03699	3.08e-20	3.37e-19
cg20162159	0.190393	0.0362495	7.39e-20	7.92e-19
cg04736140	0.189861	0.0360472	9.39e-20	9.85e-19
cg25256723	-0.187882	0.0352995	2.27e-19	2.34e-18
cg21296230	0.187813	0.0352736	2.34e-19	2.36e-18
cg09304040	0.187618	0.0352006	2.56e-19	2.53e-18
cg25898500	0.186574	0.0348097	4.06e-19	3.93e-18
cg23239039	0.183173	0.0335524	1.79e-18	1.7e-17
cg00462994	0.182377	0.0332613	2.53e-18	2.36e-17
cg19615059	0.181883	0.0330815	3.12e-18	2.87e-17
cg13656062	-0.179952	0.0323825	7.12e-18	6.42e-17
cg19008809	0.179727	0.0323018	7.84e-18	6.94e-17
cg08035942	0.179467	0.0322083	8.75e-18	7.62e-17
cg09413557	0.179193	0.03211	9.83e-18	8.42e-17
cg09045681	-0.178658	0.0319187	1.23e-17	1.04e-16
cg09809672	-0.176258	0.0310668	3.36e-17	2.79e-16
cg14754581	-0.17485	0.0305724	6.02e-17	4.91e-16
cg20570279	0.173892	0.0302384	8.93e-17	7.17e-16
cg22090592	-0.17377	0.030196	9.38e-17	7.42e-16
cg04084157	0.172751	0.0298429	1.42e-16	1.11e-15
cg10636246	0.171238	0.0293224	2.63e-16	2.01e-15
cg18691434	0.170716	0.0291439	3.24e-16	2.45e-15
cg07484827	0.168462	0.0283796	7.97e-16	5.93e-15
cg23213217	0.167829	0.0281665	1.02e-15	7.52e-15
cg11237115	0.167455	0.0280411	1.19e-15	8.59e-15
cg12373771	0.166979	0.0278821	1.43e-15	1.02e-14
cg17940013	0.166438	0.0277017	1.77e-15	1.25e-14
cg27514224	-0.16546	0.027377	2.59e-15	1.8e-14
cg11896923	0.165377	0.0273497	2.68e-15	1.83e-14
cg19663795	0.16508	0.0272515	3e-15	2.03e-14
cg04169469	0.164998	0.0272244	3.1e-15	2.07e-14
cg23818978	-0.163124	0.0266094	6.39e-15	4.21e-14
cg02154074	0.16265	0.026455	7.67e-15	4.99e-14
cg17133388	-0.161033	0.0259315	1.42e-14	9.12e-14
cg20550118	0.160747	0.0258397	1.58e-14	1e-13
cg00503840	0.160607	0.0257945	1.67e-14	1.04e-13
cg00194146	0.160211	0.0256675	1.94e-14	1.2e-13
cg13510262	0.158823	0.0252247	3.26e-14	1.99e-13
cg14916213	0.1585	0.0251224	3.67e-14	2.22e-13
cg02309431	-0.158133	0.025006	4.21e-14	2.52e-13
cg12238343	0.157772	0.0248919	4.82e-14	2.84e-13
cg07929310	0.156572	0.0245149	7.5e-14	4.38e-13
cg13514050	0.155885	0.0243002	9.65e-14	5.57e-13
cg12473775	-0.155795	0.0242721	9.97e-14	5.7e-13
cg16372520	0.155577	0.0242042	1.08e-13	6.1e-13
cg02480835	0.15543	0.0241584	1.14e-13	6.37e-13
cg04480914	0.152419	0.0232315	3.39e-13	1.87e-12
cg13975369	0.152249	0.0231799	3.6e-13	1.97e-12
cg01459453	-0.151938	0.0230851	4.02e-13	2.18e-12
cg20572838	0.151733	0.0230228	4.33e-13	2.32e-12
cg16173067	-0.148289	0.0219895	1.46e-12	7.72e-12
cg12743894	0.147519	0.021762	1.9e-12	9.98e-12
cg16718891	0.147139	0.0216498	2.17e-12	1.13e-11
cg26212924	0.146623	0.0214984	2.59e-12	1.33e-11
cg08586737	0.145125	0.0210613	4.33e-12	2.2e-11
cg07180649	0.144187	0.0207898	5.96e-12	3e-11
cg12261786	-0.14402	0.0207418	6.3e-12	3.14e-11
cg00862290	0.143651	0.0206355	7.14e-12	3.53e-11
cg26898166	0.142834	0.0204016	9.4e-12	4.6e-11
cg07850604	-0.142116	0.0201971	1.19e-11	5.79e-11
cg25229964	-0.141864	0.0201255	1.3e-11	6.24e-11
cg25769980	-0.141737	0.0200894	1.36e-11	6.45e-11
cg01441777	-0.139618	0.0194932	2.73e-11	1.29e-10
cg13307384	-0.139015	0.0193251	3.33e-11	1.55e-10
cg26581729	-0.136552	0.0186464	7.38e-11	3.42e-10
cg17923358	0.136127	0.0185305	8.45e-11	3.88e-10
cg14350002	-0.135934	0.0184781	8.99e-11	4.09e-10
cg04818845	-0.135184	0.0182748	1.14e-10	5.15e-10
cg01131735	0.13508	0.0182465	1.18e-10	5.27e-10
cg17431739	0.134784	0.0181667	1.3e-10	5.74e-10
cg06975499	0.134491	0.0180879	1.42e-10	6.24e-10
cg13587552	-0.134168	0.0180011	1.57e-10	6.86e-10
cg14918082	-0.132935	0.0176718	2.32e-10	1e-09
cg03565081	0.132885	0.0176585	2.35e-10	1.01e-09
cg14747225	0.132453	0.0175437	2.69e-10	1.14e-09
cg16340918	0.132178	0.017471	2.93e-10	1.24e-09
cg26312920	0.132123	0.0174566	2.98e-10	1.25e-09
cg22484793	0.130323	0.016984	5.2e-10	2.15e-09
cg13409216	0.130106	0.0169277	5.55e-10	2.28e-09
cg04007936	-0.129356	0.0167329	6.98e-10	2.85e-09
cg18693704	-0.129214	0.0166962	7.29e-10	2.95e-09
cg02016419	0.128742	0.0165744	8.41e-10	3.38e-09
cg11233384	0.127485	0.0162524	1.23e-09	4.89e-09
cg04755031	0.126283	0.0159474	1.76e-09	6.94e-09
cg08067365	0.125586	0.0157718	2.16e-09	8.47e-09
cg19724470	-0.124491	0.0154979	2.98e-09	1.16e-08
cg18732541	0.123799	0.0153263	3.64e-09	1.41e-08
cg06908778	0.123177	0.0151726	4.37e-09	1.67e-08
cg21649520	-0.121983	0.0148799	6.16e-09	2.34e-08
cg04333463	-0.12167	0.0148036	6.74e-09	2.55e-08
cg01252496	-0.121262	0.0147045	7.57e-09	2.84e-08
cg12188560	0.120634	0.0145525	9.05e-09	3.37e-08
cg17770886	0.119755	0.0143412	1.16e-08	4.29e-08
cg00955230	-0.119202	0.0142091	1.36e-08	4.98e-08
cg05294243	0.11841	0.014021	1.69e-08	6.17e-08
cg23376526	0.117652	0.0138419	2.09e-08	7.56e-08
cg01946401	-0.117375	0.0137769	2.25e-08	8.1e-08
cg24304712	0.116029	0.0134628	3.26e-08	1.16e-07
cg01221637	0.115008	0.0132269	4.31e-08	1.53e-07
cg04601137	0.114932	0.0132093	4.4e-08	1.55e-07
cg22395019	0.114894	0.0132007	4.44e-08	1.55e-07
cg05759269	-0.114176	0.0130363	5.39e-08	1.87e-07
cg15881088	0.114041	0.0130054	5.59e-08	1.93e-07
cg08074477	-0.113951	0.0129848	5.73e-08	1.96e-07
cg12402251	0.113878	0.0129682	5.84e-08	1.99e-07
cg02735486	0.113256	0.0128269	6.9e-08	2.33e-07
cg00338702	0.112437	0.0126422	8.58e-08	2.88e-07
cg08424423	-0.111916	0.0125252	9.85e-08	3.29e-07
cg00083937	-0.111813	0.0125022	1.01e-07	3.36e-07
cg05422352	0.111334	0.0123953	1.15e-07	3.77e-07
cg08872493	0.111323	0.0123928	1.15e-07	3.77e-07
cg20967028	0.110292	0.0121644	1.51e-07	4.9e-07
cg01335367	0.109301	0.0119467	1.95e-07	6.3e-07
cg16357381	0.108823	0.0118424	2.2e-07	7.08e-07
cg12991365	0.108662	0.0118074	2.3e-07	7.33e-07
cg01137065	-0.108486	0.0117693	2.4e-07	7.62e-07
cg08251399	-0.1077	0.0115992	2.94e-07	9.26e-07
cg19686152	-0.107583	0.011574	3.02e-07	9.48e-07
cg06327515	0.107556	0.0115684	3.04e-07	9.48e-07
cg14175438	-0.106227	0.0112841	4.26e-07	1.32e-06
cg00350702	0.106207	0.0112799	4.28e-07	1.32e-06
cg22991148	0.106131	0.0112637	4.36e-07	1.33e-06
cg17903544	0.105628	0.0111574	4.95e-07	1.5e-06
cg13994175	0.103557	0.0107241	8.26e-07	2.5e-06
cg00744433	-0.10311	0.0106317	9.21e-07	2.77e-06
cg16728114	0.102279	0.0104611	1.13e-06	3.37e-06
cg03172991	-0.101791	0.0103614	1.27e-06	3.75e-06
cg23338195	0.101787	0.0103607	1.27e-06	3.75e-06
cg25251635	0.101736	0.0103503	1.28e-06	3.77e-06
cg00845900	-0.0999596	0.00999192	1.96e-06	5.74e-06
cg13550877	-0.098062	0.00961616	3.07e-06	8.9e-06
cg02228185	-0.0974949	0.00950525	3.5e-06	1.00979e-05
cg26357744	0.0973087	0.00946897	3.65e-06	1.04831e-05
cg03703325	0.0972438	0.00945636	3.71e-06	1.05821e-05
cg17038116	0.0962	0.00925444	4.71e-06	1.33737e-05
cg13718960	0.0958953	0.0091959	5.05e-06	1.42576e-05
cg27440834	-0.0957792	0.00917365	5.18e-06	1.45593e-05
cg00113951	0.0955177	0.00912362	5.5e-06	1.53666e-05
cg13258700	0.0954582	0.00911226	5.58e-06	1.54912e-05
cg05228408	0.0951664	0.00905664	5.96e-06	1.64604e-05
cg12289045	0.0948914	0.00900437	6.34e-06	1.74215e-05
cg03340261	0.0941681	0.00886763	7.46e-06	2.0387e-05
cg27187881	-0.0941169	0.008858	7.54e-06	2.05127e-05
cg01128603	-0.0940038	0.00883672	7.74e-06	2.09275e-05
cg09096950	0.0938576	0.00880924	7.99e-06	2.15094e-05
cg26219051	0.0933945	0.00872254	8.86e-06	2.37217e-05
cg05442902	0.0933119	0.00870711	9.03e-06	2.40359e-05
cg06295856	0.0929092	0.00863212	9.87e-06	2.61433e-05
cg26711820	0.0927557	0.00860363	1.02076e-05	2.69063e-05
cg22983092	0.0919892	0.00846201	1.2082e-05	3.16844e-05
cg05440289	0.0916221	0.00839461	1.30916e-05	3.41578e-05
cg19287114	0.0909648	0.00827459	1.5104e-05	3.92095e-05
cg26394737	-0.0908743	0.00825814	1.54029e-05	3.97845e-05
cg16648841	0.0907515	0.00823584	1.58179e-05	4.06521e-05
cg21200703	0.090571	0.00820312	1.6447e-05	4.20585e-05
cg10225525	0.0901909	0.00813439	1.78512e-05	4.54233e-05
cg23191950	0.0901099	0.00811979	1.81647e-05	4.59933e-05
cg13564075	0.0889411	0.00791052	2.33158e-05	5.87467e-05
cg25136687	0.0886694	0.00786226	2.46986e-05	6.19271e-05
cg08212685	-0.0881117	0.00776366	2.77844e-05	6.9326e-05
cg10667970	-0.0877957	0.00770809	2.96915e-05	7.37267e-05
cg19371795	0.0877282	0.00769624	3.01147e-05	7.4418e-05
cg19345165	-0.0873971	0.00763826	3.22753e-05	7.93756e-05
cg19883905	0.0864178	0.00746804	3.956e-05	9.68279e-05
cg10591174	-0.0854888	0.00730833	4.78912e-05	0.000116664
cg00515905	-0.0834381	0.00696192	7.25344e-05	0.000175862
cg09630437	0.0831914	0.00692081	7.62021e-05	0.000183887
cg03724882	0.082415	0.00679224	8.89186e-05	0.000213571
cg08668790	0.0821535	0.00674919	9.36364e-05	0.000223856
cg10654016	0.0821139	0.00674269	9.43713e-05	0.000224569
cg15569512	0.0813741	0.00662175	0.000109134	0.000258501
cg09799873	-0.0811287	0.00658187	0.000114495	0.000269955
cg09404633	0.08086	0.00653833	0.000120649	0.000282408
cg22495124	-0.0808503	0.00653678	0.000120875	0.000282408
cg12145907	0.0802594	0.00644156	0.000135549	0.000315258
cg14105047	0.079874	0.00637985	0.000146004	0.000338044
cg13460409	0.0793185	0.00629142	0.000162417	0.00037436
cg13613532	0.0792048	0.00627339	0.000165984	0.00037962
cg01519742	-0.0791987	0.00627243	0.000166176	0.00037962
cg14281160	0.0791731	0.00626838	0.00016699	0.000379791
cg17605084	0.0787685	0.00620447	0.000180364	0.000408401
cg19514469	-0.0786354	0.00618353	0.000184978	0.000417012
cg03623878	0.078439	0.00615268	0.000191989	0.000430928
cg26091688	-0.0779125	0.00607036	0.000212042	0.000473867
cg23568913	0.077402	0.00599107	0.000233348	0.000519225
cg14550518	0.0773411	0.00598165	0.000236019	0.000522904
cg05492270	0.0763217	0.005825	0.000285224	0.000629206
cg17966192	-0.0761922	0.00580525	0.000292119	0.000641663
cg08896629	0.0761119	0.00579303	0.000296473	0.000648455
cg02197293	-0.0746638	0.00557469	0.000386219	0.000841172
cg16612562	-0.0745956	0.00556451	0.000391017	0.000848029
cg13654195	-0.0742554	0.00551386	0.000415787	0.000897961
cg09851465	0.0739542	0.00546922	0.000438932	0.000943979
cg09434995	-0.0738662	0.00545622	0.000445914	0.000954999
cg24556026	-0.0736797	0.0054287	0.000461064	0.000983347
cg08487374	0.07358	0.00541401	0.000469359	0.000993647
cg07211259	0.0735601	0.00541109	0.000471027	0.000993647
cg26815229	-0.0735513	0.00540979	0.000471772	0.000993647
cg05125838	-0.0735293	0.00540656	0.000473626	0.000993647
cg02071305	0.0734509	0.00539503	0.000480303	0.00100356
cg26614073	-0.0732302	0.00536266	0.000499571	0.00103959
cg13351161	-0.0728208	0.00530287	0.000537221	0.00111343
cg25881193	0.0726446	0.00527723	0.000554231	0.00114408
cg23173910	-0.0725169	0.0052587	0.000566869	0.00116548
cg21184495	0.0721837	0.00521048	0.000601114	0.00123097
cg17896249	0.0719538	0.00517735	0.000625849	0.00127653
cg13119609	-0.0711089	0.00505648	0.000725142	0.00147321
cg00582628	0.0710016	0.00504123	0.000738742	0.00149493
cg12177001	-0.070853	0.00502014	0.000757989	0.00152787
cg15856055	0.0702138	0.00492998	0.00084614	0.00169889
cg00261781	0.0698721	0.00488212	0.000897076	0.00179415
cg18003795	-0.0696049	0.00484484	0.000938876	0.00187047
cg00297600	0.0694865	0.00482837	0.000957974	0.00190115
cg13042288	-0.0693786	0.00481339	0.000975674	0.00192883
cg08900043	0.0691818	0.00478612	0.00100876	0.0019866
cg19566405	-0.0690965	0.00477433	0.00102342	0.00200778
cg02631957	0.0685915	0.00470479	0.00111433	0.00217781
cg06189653	0.0684463	0.00468489	0.00114181	0.00222307
cg04416752	0.0681796	0.00464846	0.00119392	0.00231576
cg06533629	0.0673341	0.00453388	0.00137403	0.00265507
cg19398783	0.0669578	0.00448334	0.00146198	0.00281444
cg13656360	0.0666418	0.00444112	0.00153981	0.00295321
cg18996776	-0.0665069	0.00442317	0.00157416	0.00300788
cg08331960	0.0664508	0.00441571	0.00158867	0.00302435
cg26096837	0.0662695	0.00439165	0.00163637	0.00310366
cg08529529	0.0656084	0.00430447	0.00182169	0.00344247
cg12247247	-0.065203	0.00425143	0.00194469	0.00366142
cg16854606	0.0647993	0.00419895	0.0020747	0.00389195
cg15447479	0.0643601	0.00414222	0.00222515	0.00415379
cg20173259	0.0643451	0.00414029	0.00223044	0.00415379
cg22971191	-0.0637052	0.00405835	0.00246808	0.0045719
cg17726022	0.0636932	0.00405683	0.00247274	0.0045719
cg06994793	0.0632174	0.00399644	0.00266455	0.00490889
cg15963417	0.0629008	0.00395651	0.00279961	0.00513928
cg05316065	0.0628428	0.00394922	0.00282498	0.0051674
cg26104204	0.0628049	0.00394446	0.0028417	0.00517955
cg13449372	-0.0617278	0.00381032	0.00335618	0.00609568
cg20492933	0.0611542	0.00373983	0.00366347	0.00663037
cg02802055	0.0609314	0.00371263	0.00378959	0.00683456
cg13296371	-0.0605836	0.00367038	0.00399429	0.00717854
cg01261503	-0.0605338	0.00366435	0.0040244	0.00720746
cg26201213	0.060152	0.00361826	0.0042623	0.00760702
cg00412772	-0.0593783	0.00352578	0.00478386	0.00850832
cg01651821	0.0593416	0.00352143	0.00480995	0.00852521
cg25092328	0.0585939	0.00343325	0.00537083	0.00947519
cg05697249	0.0585788	0.00343147	0.00538279	0.00947519
cg26665419	-0.0578235	0.00334356	0.0060099	0.010543
cg19722847	-0.0572794	0.00328093	0.00650167	0.0113669
cg27367952	-0.0571051	0.00326099	0.00666664	0.0116158
cg15344028	0.0568646	0.00323358	0.0069005	0.0119826
cg11177450	-0.0567307	0.00321838	0.00703383	0.012173
cg16743289	0.0563803	0.00317874	0.00739387	0.0127532
cg00079056	-0.0560836	0.00314537	0.00771158	0.0132567
cg06690548	-0.055745	0.0031075	0.00808903	0.0138592
cg23127998	-0.0555835	0.00308952	0.0082748	0.0141304
cg17641104	0.0554675	0.00307665	0.0084105	0.0143146
cg02503970	0.054826	0.00300589	0.00919801	0.0156032
cg16713727	-0.0545099	0.00297132	0.00960973	0.016248
cg06134964	-0.054466	0.00296654	0.00966813	0.0162932
cg03007010	0.0542436	0.00294237	0.0099691	0.0167455
cg01211097	0.0535971	0.00287265	0.0108922	0.0182364
cg20891917	-0.0532825	0.00283903	0.0113681	0.0189715
cg19731122	-0.0531495	0.00282487	0.0115749	0.019254
cg14467840	-0.0530151	0.0028106	0.0117872	0.019544
cg03535648	-0.0525138	0.0027577	0.0126097	0.0208405
cg11833861	-0.0524184	0.00274769	0.0127719	0.0210408
cg12813792	0.0517475	0.0026778	0.0139653	0.0229335
cg09480837	-0.051159	0.00261725	0.015092	0.0247047
cg08694544	0.0505834	0.00255868	0.0162708	0.0265497
cg20828084	-0.050032	0.0025032	0.0174749	0.0284243
cg21907579	0.0499971	0.00249971	0.0175538	0.0284627
cg25428451	0.0497961	0.00247965	0.0180135	0.0291161
cg10158181	0.0497707	0.00247712	0.0180723	0.0291197
cg24505341	0.0492195	0.00242256	0.0193914	0.0311474
cg18468844	0.0491457	0.0024153	0.0195742	0.0313432
cg03819692	0.0486287	0.00236475	0.0208981	0.0333591
cg03991512	-0.0482205	0.00232522	0.0219975	0.0350053
cg23159337	0.0475427	0.00226031	0.0239345	0.0379701
cg03977782	0.0467534	0.00218588	0.0263748	0.0417127
cg12265604	0.0455331	0.00207326	0.0305699	0.0481992
cg21053529	-0.0454667	0.00206722	0.0308139	0.0484353
cg26109803	-0.0451859	0.00204177	0.0318635	0.0499324
cg26382071	0.0450861	0.00203276	0.0322439	0.0503749
cg19028160	0.0449243	0.00201819	0.0328689	0.0511958
cg05851163	-0.0440625	0.00194151	0.036375	0.0564857
cg11618577	-0.0440093	0.00193682	0.0366017	0.0566666
cg10669058	0.0439366	0.00193043	0.0369129	0.0569766
cg06363129	0.0437182	0.00191128	0.0378624	0.0582674
cg09548179	0.0435665	0.00189804	0.0385337	0.0589886
cg00230271	0.0435493	0.00189654	0.0386105	0.0589886
cg13700897	0.0435348	0.00189528	0.0386754	0.0589886
cg12324144	-0.0433686	0.00188084	0.0394251	0.0599541
cg18241647	-0.0429614	0.00184568	0.0413141	0.0625865
cg17627559	0.0429433	0.00184413	0.0413997	0.0625865
cg15811427	0.0422382	0.00178406	0.0448578	0.0676156
cg21081971	0.0418882	0.00175463	0.0466624	0.069949
cg00168942	-0.0418853	0.00175438	0.046678	0.069949
cg20674577	0.0418456	0.00175105	0.0468865	0.0700571
cg23668631	0.0416764	0.00173692	0.0477845	0.0711919
cg04014889	-0.0412443	0.00170109	0.0501429	0.0744898
cg10570177	-0.0402914	0.0016234	0.0556903	0.0824922
cg14473016	0.0396533	0.00157238	0.0596835	0.0881532
cg18001427	-0.0396182	0.0015696	0.0599101	0.0882343
cg08654655	0.0393939	0.00155188	0.0613735	0.0901313
cg22179082	-0.0392708	0.00154219	0.0621894	0.0910694
cg08587542	0.0391548	0.00153309	0.0629662	0.091945
cg15903282	0.0389213	0.00151487	0.0645537	0.093996
cg07817698	0.0388737	0.00151116	0.0648819	0.094207
cg26394940	-0.0386391	0.00149298	0.066517	0.0962406
cg01254459	0.0386193	0.00149145	0.0666569	0.0962406
cg20066677	0.0385342	0.00148488	0.0672592	0.0968382
cg03929796	0.0382352	0.00146193	0.0694116	0.099658
cg06171242	0.037457	0.00140303	0.0752814	0.107784
cg19632206	0.037152	0.00138027	0.0776892	0.110923
cg01114088	-0.0361683	0.00130814	0.0858864	0.122287
cg01930621	0.0360218	0.00129757	0.0871649	0.123629
cg15642326	0.0359994	0.00129595	0.0873617	0.123629
cg23152772	0.0359677	0.00129367	0.0876408	0.123629
cg13571802	-0.0359506	0.00129245	0.0877912	0.123629
cg25713185	0.03565	0.00127092	0.0904782	0.127065
cg05898102	0.0354808	0.00125889	0.0920193	0.128877
cg09196959	-0.0346108	0.00119791	0.100278	0.140063
cg26824091	-0.0339327	0.00115143	0.107117	0.149209
cg07038400	0.0334259	0.00111729	0.112466	0.156237
cg22473095	-0.0328075	0.00107633	0.119274	0.165173
cg03112869	-0.0327838	0.00107478	0.119542	0.165173
cg22407458	0.032604	0.00106302	0.121584	0.167545
cg03258472	0.0324833	0.00105516	0.122971	0.169003
cg17324128	0.0322172	0.00103795	0.126071	0.172801
cg11459714	-0.0321744	0.00103519	0.126575	0.173031
cg26746469	-0.0321174	0.00103153	0.127249	0.17349
cg21099326	0.0320518	0.00102731	0.128029	0.174092
cg11426590	-0.0319943	0.00102364	0.128714	0.174562
cg15381313	-0.03183	0.00101315	0.13069	0.176776
cg22580353	-0.0317199	0.00100615	0.132027	0.178115
cg22282672	0.0315142	0.000993143	0.134554	0.181049
cg15498283	-0.0310584	0.000964624	0.140285	0.188268
cg18881501	0.0309591	0.000958465	0.141558	0.189482
cg21712685	-0.0305003	0.000930268	0.147556	0.196997
cg11631518	0.0303323	0.000920048	0.1498	0.199475
cg21801378	-0.0302453	0.000914776	0.150973	0.200517
cg13843773	-0.030151	0.000909083	0.152251	0.201693
cg01056568	0.0300983	0.000905907	0.152969	0.202124
cg23234999	-0.0298113	0.000888713	0.156926	0.20682
cg15966757	-0.0290313	0.000842815	0.168069	0.22094
cg24651706	0.0289157	0.000836117	0.16977	0.222606
cg24505122	-0.0288514	0.000832401	0.170721	0.223284
cg26932976	0.0288134	0.00083021	0.171286	0.223454
cg16295988	-0.0283328	0.000802746	0.178543	0.232331
cg27244482	0.0282923	0.000800452	0.179165	0.232552
cg21926612	0.0281404	0.000791881	0.181511	0.235004
cg27626102	-0.027524	0.000757568	0.191267	0.247014
cg05087948	-0.0270446	0.00073141	0.199118	0.256507
cg11487705	0.0268648	0.000721718	0.202121	0.259726
cg21762589	-0.0265881	0.000706927	0.206809	0.265087
cg22396353	-0.0263404	0.000693816	0.211072	0.269878
cg13861644	0.0262747	0.000690361	0.212213	0.270664
cg01918706	0.0260033	0.00067617	0.216975	0.276053
cg19356189	-0.0254396	0.000647173	0.227109	0.288232
cg09294589	0.0253394	0.000642083	0.228946	0.289175
cg07073964	-0.0253376	0.000641996	0.228977	0.289175
cg06637774	-0.0246776	0.000608983	0.241338	0.304039
cg26022315	0.0241287	0.000582194	0.251969	0.316103
cg12864235	0.0241198	0.000581763	0.252144	0.316103
cg24493940	-0.024059	0.000578837	0.253341	0.31683
cg19560210	-0.0237952	0.000566214	0.258584	0.321974
cg16466334	-0.0237891	0.000565921	0.258707	0.321974
cg00410898	0.0236776	0.000560628	0.260946	0.323303
cg06958034	0.0236733	0.000560426	0.261032	0.323303
cg13631913	-0.0235964	0.000556789	0.262586	0.324445
cg18384097	0.0235294	0.000553632	0.263943	0.32534
cg15171237	-0.023444	0.00054962	0.265681	0.326482
cg16313343	-0.0234215	0.000548566	0.26614	0.326482
cg11490446	0.0230927	0.000533271	0.272913	0.333993
cg25536676	0.022997	0.000528863	0.274905	0.335632
cg07265300	0.0227733	0.000518624	0.279602	0.340558
cg20234170	-0.0218135	0.000475828	0.300374	0.364993
cg06638451	0.0213486	0.000455761	0.310796	0.376767
cg15489301	0.020162	0.000406508	0.338461	0.408602
cg05441133	-0.0201543	0.000406196	0.338647	0.408602
cg00335286	0.0199271	0.000397091	0.34412	0.413571
cg22809047	0.019896	0.000395852	0.344874	0.413571
cg19297232	-0.0198835	0.000395353	0.345179	0.413571
cg13323474	0.0197755	0.000391072	0.347804	0.415747
cg04087608	-0.0196348	0.000385524	0.351248	0.418889
cg02151301	-0.0194982	0.000380181	0.354607	0.421917
cg19685066	-0.0194307	0.000377554	0.356276	0.422923
cg16354207	0.0192039	0.000368789	0.36192	0.427402
cg24110063	0.0191819	0.000367946	0.36247	0.427402
cg11903057	0.019179	0.000367833	0.362543	0.427402
cg14689355	-0.0190766	0.000363915	0.365113	0.429446
cg13218906	-0.0179473	0.000322107	0.394188	0.462
cg10052840	-0.0179322	0.000321563	0.394587	0.462
cg10878896	0.0177011	0.000313329	0.400709	0.468101
cg15611364	0.0173853	0.000302248	0.409167	0.476898
cg08169325	-0.0171247	0.000293255	0.416225	0.484027
cg10795646	-0.0168581	0.000284196	0.42352	0.490971
cg22512531	-0.0168368	0.000283477	0.424107	0.490971
cg22197830	-0.0165165	0.000272796	0.432975	0.500111
cg10202457	0.0162762	0.000264914	0.439701	0.506741
cg12985418	-0.0162278	0.000263341	0.441063	0.507173
cg07494518	0.0157892	0.000249299	0.45351	0.519291
cg19149785	-0.0157853	0.000249175	0.453622	0.519291
cg27655905	0.0153184	0.000234654	0.467088	0.533519
cg09892203	0.0151791	0.000230406	0.471149	0.536964
cg15887846	-0.0147428	0.000217351	0.483992	0.55038
cg15427448	-0.014671	0.000215238	0.486125	0.551229
cg08899632	-0.0146455	0.000214491	0.486883	0.551229
cg05270634	0.0137255	0.000188388	0.514664	0.581401
cg17526300	0.0134573	0.0001811	0.522912	0.589423
cg04359302	-0.0133129	0.000177234	0.527382	0.593161
cg16408970	-0.0130253	0.00016966	0.536343	0.601922
cg21201109	0.0123407	0.000152293	0.557977	0.624837
cg05501584	-0.0120296	0.00014471	0.567948	0.63462
cg12269343	-0.0118228	0.000139779	0.574619	0.639455
cg05473871	0.0118073	0.000139413	0.575121	0.639455
cg19439331	-0.01178	0.000138768	0.576007	0.639455
cg25022327	0.0117374	0.000137766	0.577387	0.639606
cg19378133	0.0114522	0.000131152	0.586672	0.648494
cg17749443	-0.0112355	0.000126237	0.593772	0.654933
cg13509147	-0.0105323	0.000110929	0.61708	0.679185
cg22582569	0.0103846	0.00010784	0.622026	0.683165
cg09556292	0.0102288	0.000104628	0.627263	0.687448
cg01400401	-0.00999888	9.99776e-05	0.635023	0.693051
cg26350286	-0.00999744	9.99487e-05	0.635072	0.693051
cg14009688	-0.00978441	9.57348e-05	0.642299	0.699452
cg05532892	-0.00966562	9.34242e-05	0.646344	0.702369
cg13854874	0.00955439	9.12864e-05	0.65014	0.705004
cg13899108	-0.00950744	9.03913e-05	0.651746	0.705258
cg25459323	0.00920858	8.4798e-05	0.662002	0.714851
cg01511567	-0.00913794	8.3502e-05	0.664436	0.715975
cg17129388	0.00849934	7.22388e-05	0.686595	0.737604
cg20090497	0.00847693	7.18584e-05	0.687378	0.737604
cg20761322	0.00800685	6.41096e-05	0.703872	0.753729
cg17536848	0.00792862	6.2863e-05	0.70663	0.75511
cg16816226	-0.00749618	5.61928e-05	0.721948	0.769773
cg00943950	-0.00745685	5.56046e-05	0.723347	0.769773
cg23710218	0.0073388	5.38579e-05	0.727551	0.772647
cg21006686	-0.00722752	5.22371e-05	0.731521	0.775262
cg09254939	-0.00708771	5.02356e-05	0.73652	0.778953
cg21363706	0.00695604	4.83865e-05	0.741238	0.782333
cg18117393	-0.00671216	4.5053e-05	0.750002	0.78889
cg23124451	-0.00669778	4.48602e-05	0.75052	0.78889
cg22594309	-0.00606351	3.67662e-05	0.773466	0.81135
cg01450842	0.00597925	3.57514e-05	0.77653	0.812905
cg04718414	-0.00575031	3.30661e-05	0.784872	0.819968
cg21137706	-0.00558168	3.11551e-05	0.791033	0.824728
cg01623187	-0.0053865	2.90143e-05	0.798179	0.830494
cg09322949	0.00513761	2.6395e-05	0.807317	0.838305
cg07236943	0.00501834	2.51838e-05	0.811705	0.841162
cg22511262	-0.0048973	2.39836e-05	0.816164	0.844081
cg21993406	-0.00482485	2.32791e-05	0.818836	0.845144
cg16319578	0.00425126	1.80732e-05	0.840063	0.865316
cg24208206	0.00418498	1.75141e-05	0.842524	0.866114
cg00412805	0.00389357	1.51599e-05	0.85336	0.874885
cg24332433	0.0038325	1.4688e-05	0.855635	0.874885
cg14972143	-0.00381835	1.45798e-05	0.856162	0.874885
cg02976574	-0.00354719	1.25826e-05	0.866277	0.883465
cg19573166	-0.00294503	8.67e-06	0.888815	0.902895
cg21835643	0.0029443	8.67e-06	0.888842	0.902895
cg16984944	-0.0027179	7.39e-06	0.897341	0.90973
cg18392482	-0.00261928	6.86e-06	0.901046	0.911688
cg03387497	-0.00250801	6.29e-06	0.905229	0.914121
cg18587364	0.00220063	4.84e-06	0.916799	0.92399
cg01626227	0.00143042	2.05e-06	0.945862	0.951415
cg18771300	0.00116457	1.36e-06	0.955913	0.959647
cg04616566	-0.000765903	5.87e-07	0.970997	0.97289
cg08475827	-0.000301805	9.11e-08	0.988569	0.988569
